# Supplementary material for: Strigolactone signaling regulates cambial activity through repression of WOX4 by transcription factor BES1
Source: PubMed Central journal article supplement — Plant Physiol. 2021 Oct 23;188(1):255–67. doi: 10.1093/plphys/kiab487 (PMC8774819; doi:10.1093/plphys/kiab487), 2021-10-23
Supplement: kiab487_supplementary_data.pdf [file kiab487_supplementary_data.pdf]

## Supplemental Data

**Supplemental Figure S1.** Measured regions of the lateral vascular cambium.

**Supplemental Figure S2.** The representative pictures of whole stem sections of different plants.

**Supplemental Figure S3.** The hypocotyl phenotype of different plants.

**Supplemental Figure S4.** Expression pattern of *BES1(L)* and *BES1(S)* in the secondary stem and vasculature.

**Supplemental Figure S5.** Identification and phenotypes of the *max2-1 BES1-RNAi* line.

**Supplemental Figure S6.** Transient luciferase assay in *N. benthamiana* leaves demonstrates the co-expression with BES1 specifically repress *WOX4pro:LUC* activity.

**Supplemental Figure S7.** *WOX4* transcript levels in the SL biosynthetic and signaling mutants *max3-1*, *max2-1*, and *Atd14-1*.

**Supplemental Figure S8.** Phenotypes of the *gWOX4-GFP/max2-1*.

**Supplemental Figure S9.** Phenotype of the hypocotyl of *gWOX4-GFP/max2-1*.

**Supplemental Table S1.** Primers for genotyping, ChIP, EMSA, qPCR, and recombinant vectors.

**Supplemental Table S2.** Plasmids and restriction sites used for recombinant vectors.

**Supplemental Table S3.** Accession numbers of genes.

## Supplemental Figures

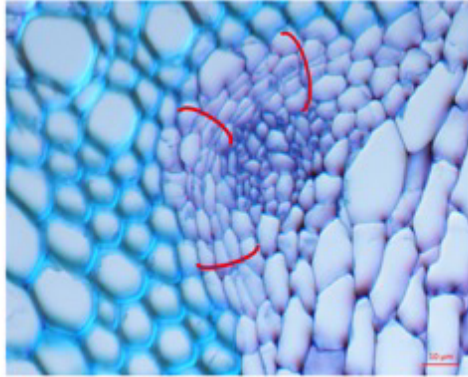

**Supplemental Figure S1. Measured regions of the lateral vascular cambium. Relates to Figures 1, 2, 3, and 5.**

The measured regions of the lateral vascular cambium are indicated by the red lines.

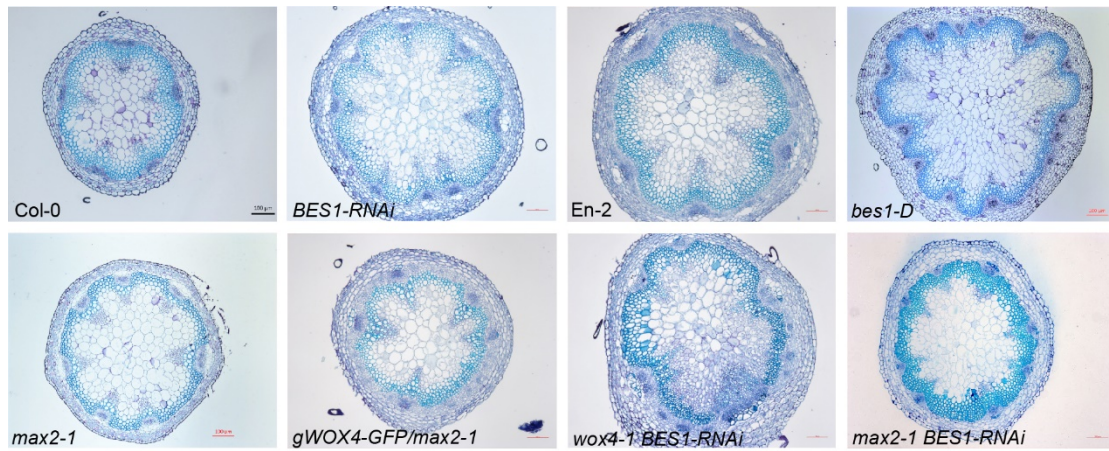

**Supplemental Figure S2. The representative pictures of whole stem sections of different plants. Related to Figure 1, 2, 3, 5. Bars = 100 µm.**

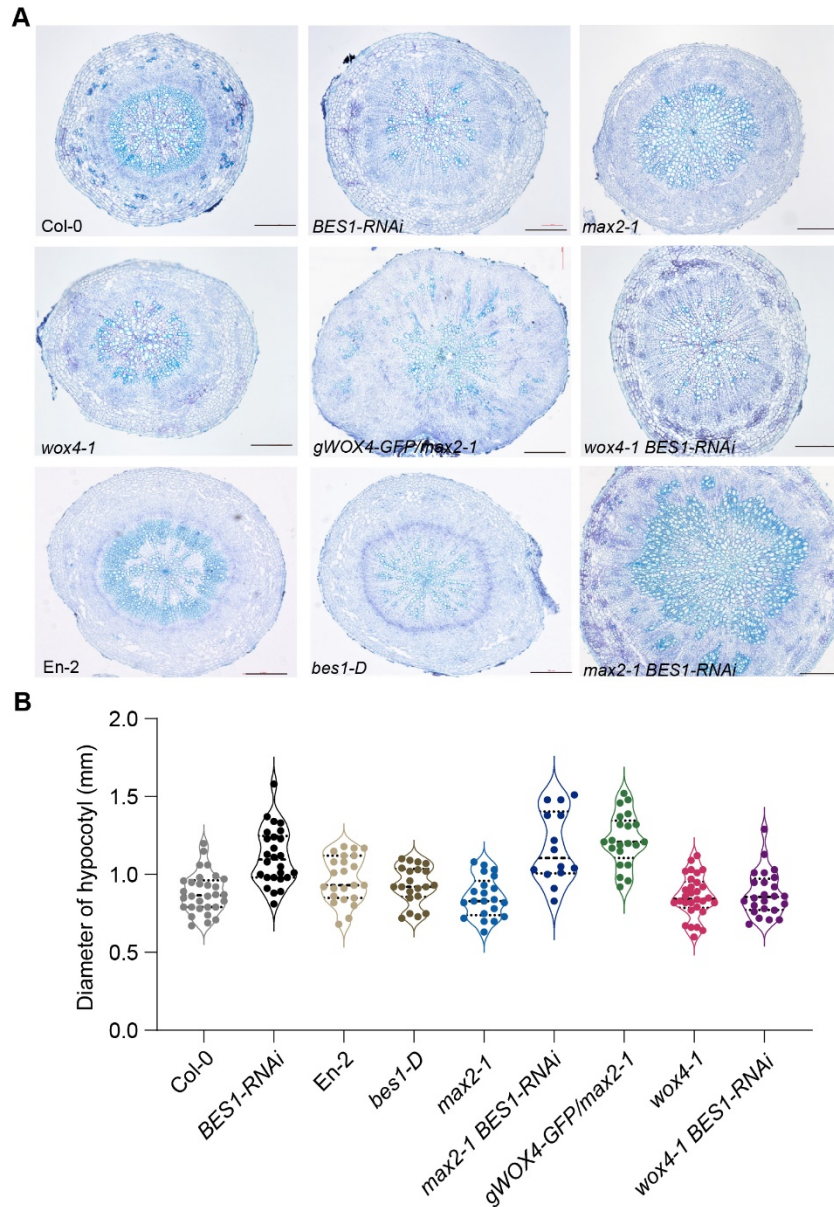

**Supplemental Figure S3. The hypocotyl phenotype of different plants. Related to Figure 1, 2, 3, 5.**

(A) The representative pictures of whole hypocotyl sections of different plants. (B) The hypocotyl diameter of plants in (A). The hypocotyl (2 mm immediately below the shoot-hypocotyl junction) of 4-weeks-old plants (about 15 cm high) were immediately measured after being pulling out of soil. From 5 to 10 plants were measured three times each line. Bars = 200  $\mu$ m.

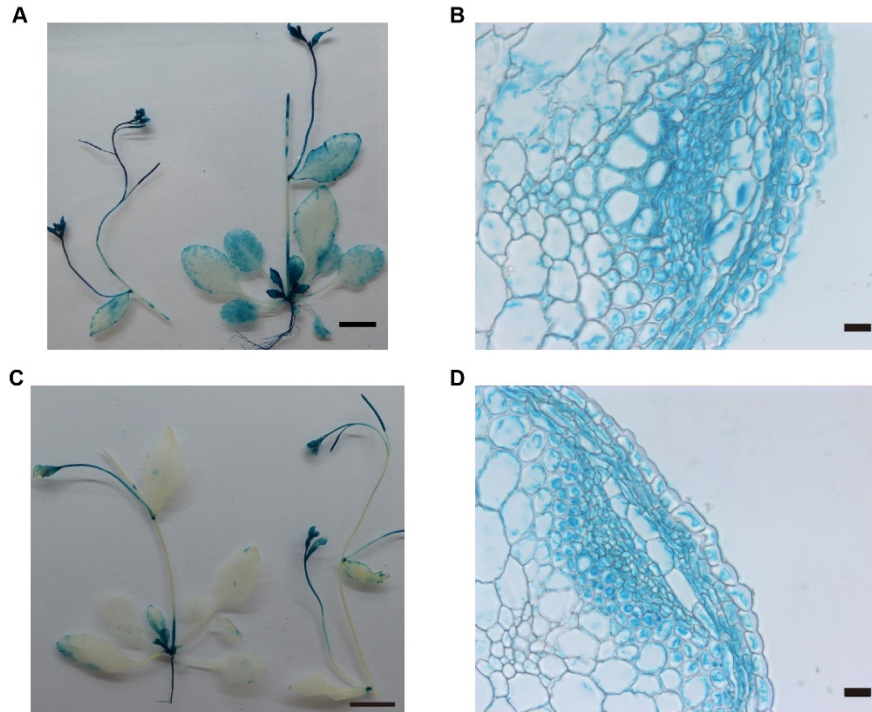

**Supplemental Figure S4. Expression patterns of the *BES1(L)* and *BES1(S)* in the secondary stem and vasculature. Related to Figure 1.**

(A, B) GUS staining of the secondary stem (A) and its cross section (B) for the *BES1(L)pro:GUS* reporter line in the En-2 background. (C, D) GUS staining of the secondary stem and its cross section for the *BES(S)pro:GUS* reporter line in the En-2 background. Bars = 1 cm in (A) and (C), Bars = 20  $\mu$ m in (B) and (D).

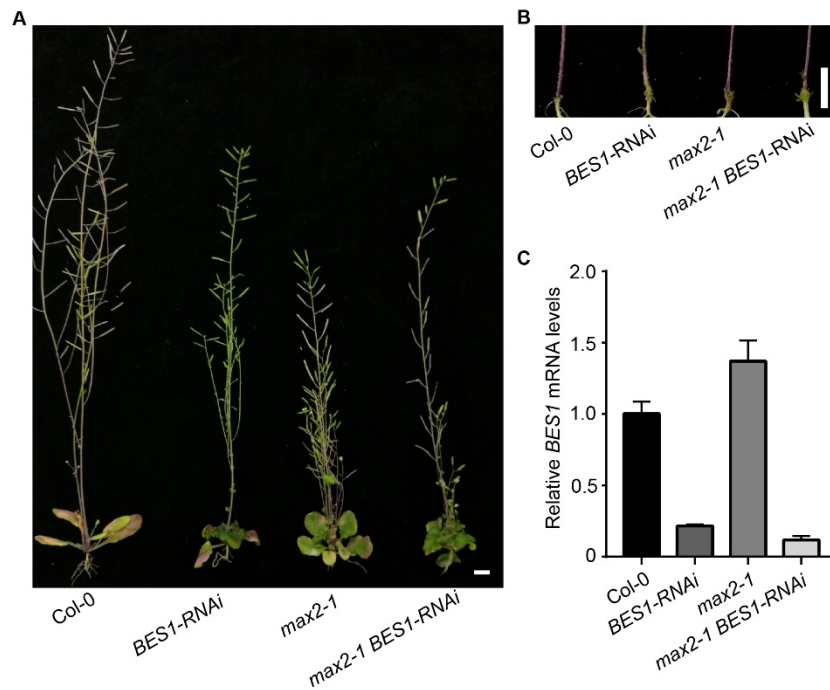

**Supplemental Figure S5. Identification and phenotypes of the *max2-1 BES1-RNAi* line. Related to Figure 2.**

(A) Representative photographs of 8-week-old Col-0, *BES1-RNAi*, *max2-1*, and *max2-1 BES1-RNAi* plants. (B) Representative photographs of basal stems and hypocotyls of 8-week-old Col-0, *BES1-RNAi*, *max2-1*, and *max2-1 BES1-RNAi* plants. Bar represents 1 cm. (C) Relative *BES1* mRNA levels in seedlings of Col-0, *BES1-RNAi*, *max2-1*, and *max2-1 BES1-RNAi* plants. Data are means  $\pm$  SD ( $n = 3$ ). Bars represent 1 cm.

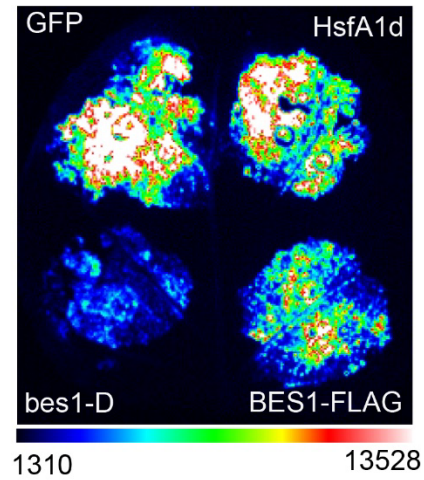

**Supplemental Figure S6. Transient luciferase assay in *N. benthamiana* leaves demonstrates the co-expression with BES1 specifically repress *WOX4pro:LUC* activity. Related to Figure 3.** The HsfA1d was used as the unrelated transcription factor control, GFP was the control effector. Effectors were BES1-FLAG and a stable-form BES1 (bes1-D), and *WOX4pro-LUC* was the reporter.

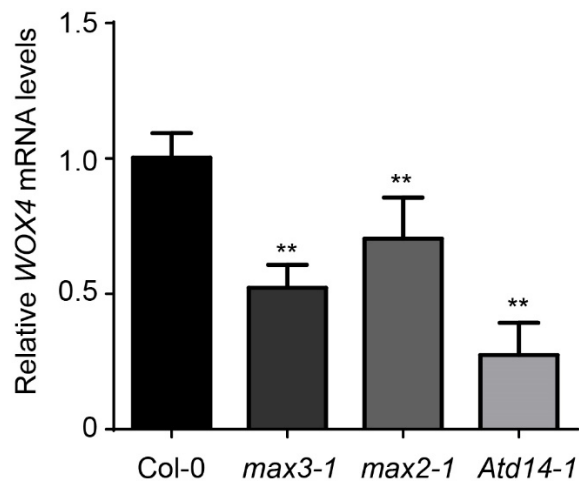

**Supplemental Figure S7. Reduced *WOX4* transcript levels in the SL biosynthetic and signaling mutants *max3-1*, *max2-1*, and *Atd14-1*. Related to Figure 5.**

The relative *WOX4* transcript level in Col-0 was set as "1". Data are means  $\pm$  SD ( $n = 3$ ). *P* values were determined by Student's *t*-test, \*\**P* < 0.01.



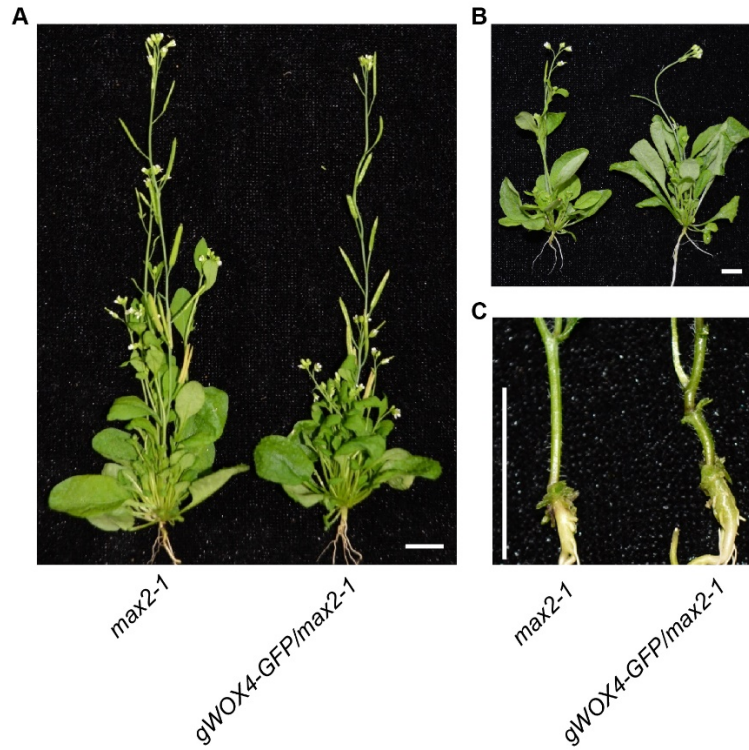

**Supplemental Figure S8. Phenotype of the *gWOX4-GFP/max2-1*. Related to Figure 5.**

(A) Representative photographs of 6-week-old *max2-1* and *gWOX4-GFP/max2-1* plants.

(B) Representative photographs of 3-week-old *max2-1* and *gWOX4-GFP/max2-1* plants.

(C) Representative photographs of basal stems and hypocotyls of *max2-1* and *gWOX4-GFP/max2-1* plants shown in (A). Bars represent 1 cm.

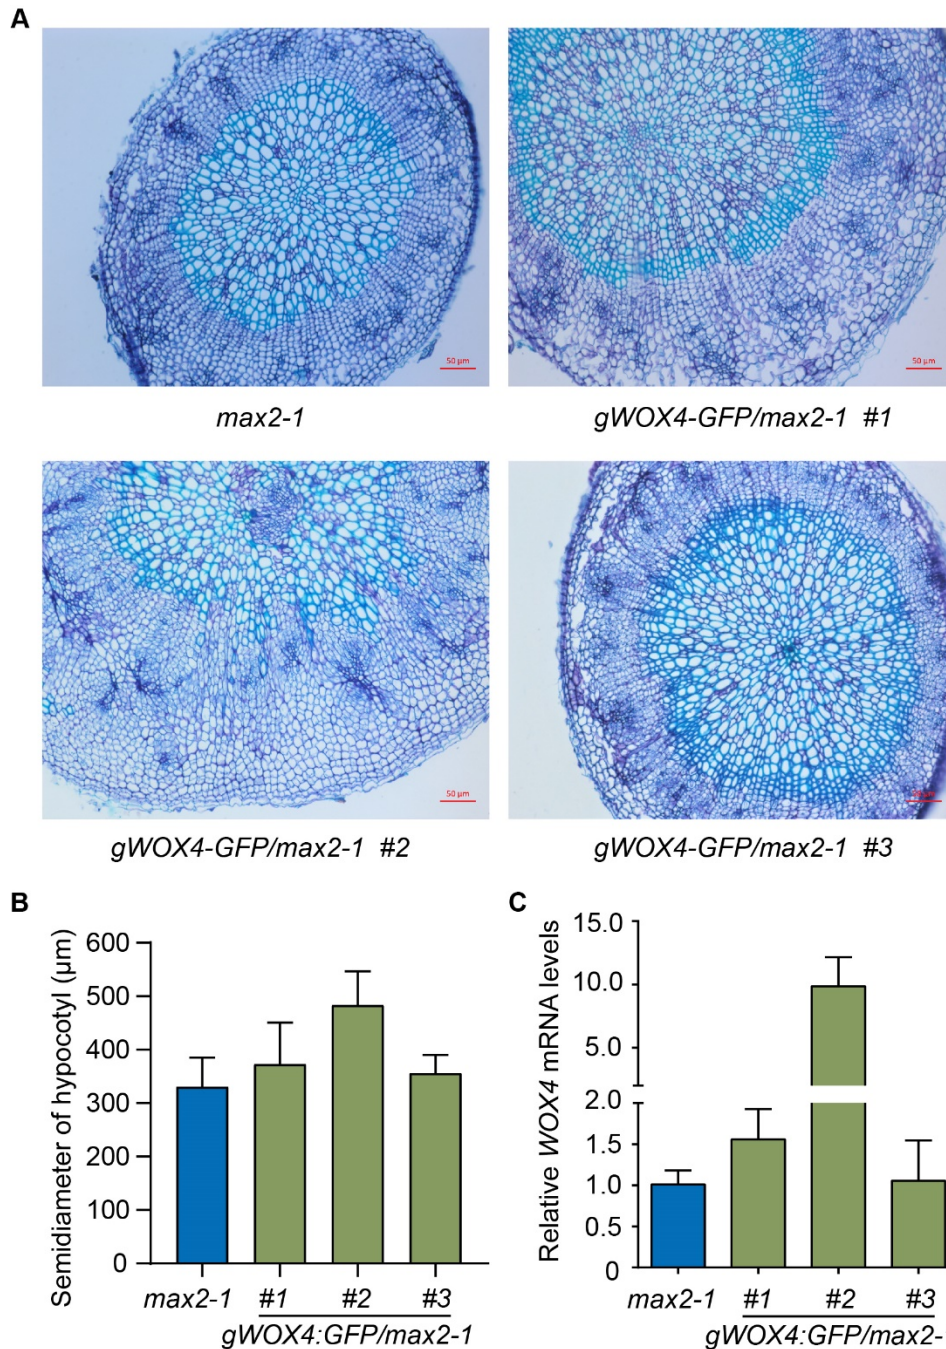

**Supplemental Figure S9. Phenotype of the hypocotyl of *gWOX4-GFP/max2-1*. Related to Figure 5.**

(A) Representative cross sections of the hypocotyl of *max2-1* plants and three independent *gWOX4-GFP/max2-1* lines (8-week-old plants). Bars = 50 µm.

(B) Quantification of the semidiameter of hypocotyl in *max2-1* plants and three independent *gWOX4-GFP/max2-1* lines shown in (A). Data are means ± SD, n=15 (5 number were collected randomly in 3 plants/line).

(C) Relative *WOX4* mRNA levels in seedlings of *max2-1* and three independent lines of *gWOX4-GFP/max2-1* in (A&B).

Relative *WOX4* transcript levels were set to “1” in *max2-1*. Data are means ± SD (n = 3).

**Supplemental Table S1. Primers for genotyping, CHIP, EMSA, qPCR, and recombinant vectors.**

| <b>Name</b>               | <b>sequences 5'–3'</b>                               |
|---------------------------|------------------------------------------------------|
| <i>WOX4pro</i> -CHIP-F1-F | TGATCACAGCTTGACACACGA                                |
| <i>WOX4pro</i> -CHIP-F1-R | ACCAGTGTAGGTTGATCATGACT                              |
| <i>WOX4pro</i> -CHIP-F2-F | AGTCATGATCAACCTACACTGGT                              |
| <i>WOX4pro</i> -CHIP-F2-R | GGTTTGGCAATGTCAAGCGT                                 |
| <i>WOX4pro</i> -CHIP-F3-F | AGGTTCTGCAGTTCCCGATG                                 |
| <i>WOX4pro</i> -CHIP-F3-R | GTCGAATGCTTTTCGGTGGC                                 |
| <i>WOX4pro</i> -CHIP-F4-F | TGAGAGCCACCGAAAAGCAT                                 |
| <i>WOX4pro</i> -CHIP-F4-R | GTCTGCATGGAGCACTACTT                                 |
| <i>WOX4pro</i> -CHIP-F5-F | AGTGCTCCATGCAGACATGA                                 |
| <i>WOX4pro</i> -CHIP-F5-R | TCCAGATGAAGAAAACCCA                                  |
| Probe a-F                 | CCATCTGATCACAGCTTGACACACGAATCAGGT<br>TATCCATCGTGTGA  |
| Probe a-R                 | TCACACGATGGATAACCTGATTCGTGTGTCAAG<br>CTGTGATCAGATGG  |
| Probe b-F                 | ATCATCTGTTCATTTTCCATTCTTTTTCTTTTTCC<br>TACCCAACCTGGA |
| Probe b-R                 | TCCAGTTGGGTAGGAAAAAGAAAAAGAATGGA<br>AAATGAACAGATGAT  |
| Probe c-F                 | GTAACGAGAAAGGCATGCATAGCATTGCTAGT<br>TTAACATATAGCA    |
| Probe c-R                 | TGCTATATGTTAAAAGTAGCAAATGCTATGCAT<br>GCCTTTCTCGTTAC  |
| <i>WOX4</i> -CDs-F        | ATGAAGGTTTCATGAGTTTTTCGA                             |
| <i>WOX4</i> -CDs-R        | TCTCCCTTCAGGATGGAGAG                                 |
| <i>WOX4pro</i> -F         | ACATATGAACAGTGGTAGAG                                 |
| <i>WOX4pro</i> -R         | CATTGCTATATGTTAAAA                                   |
| LBP1.3                    | ATTTTGCCGATTTTCGGAAC                                 |
| <i>max2-1</i> -LP         | TACATGCAAGCATGCAACTTC                                |
| <i>max2-1</i> -RP         | AATAGGAACAAAATCGCCACC                                |
| <i>wox4-1</i> -LP         | AGGTCTACCCCTTTTCAACG                                 |
| <i>wox4-1</i> -RP         | AATGTGTGGGTTTCAGTTGGAG                               |
| <i>WOX4</i> -RT-F         | CGATCAAACCGGTCCGACAA                                 |
| <i>WOX4</i> -RT-R         | TTCTTGAGTCGGGTCCACC                                  |
| <i>ACTINpro</i> -CHIP-F   | ACGAGGGAAAAGGCTGTCTG                                 |
| <i>ACTINpro</i> -CHIP-R   | GTCGCCGAGATTCAAACG                                   |
| <i>U-box</i> -RT-F        | TCTTCTTCTGCTACATCTACTCTC                             |
| <i>U-box</i> -RT-R        | AGTGTGTGAACCCGTGAAC                                  |

**Supplemental Table S2. Plasmids and restriction sites used for recombinant vectors.**

| <b>Name</b>                   | <b>Plasmids</b>           | <b>Restriction sites</b> |
|-------------------------------|---------------------------|--------------------------|
| WOX4pro:LUC                   | pCAMBIA1300 with LUC tag  | EcoR I/Sac I             |
| <i>35Spro:BES1-FLAG</i>       | pCAMBIA1306 with FLAG tag | Kpn I/Xba I              |
| <i>WOX4pro:LUC-35Spro:REN</i> | pGreenII 0800-LUC         | Hind III/BamH I          |
| <i>gWOX4-GFP</i>              | pCAMBIA1302 with GFP tag  | EcoR I/Sac I             |
| <i>35S:WOX4-HA</i>            | pCAMBIA1300 with HA tag   | Kpn I/Xba I              |

**Supplemental Table S3. Accession numbers of genes.**

| <b>Gene name</b> | <b>Accession number</b> |
|------------------|-------------------------|
| <i>ACTIN</i>     | <i>AT3G18780</i>        |
| <i>BES1</i>      | <i>AT1G19350</i>        |
| <i>D14</i>       | <i>AT3G03990</i>        |
| <i>HsfA1d</i>    | <i>AT1G32330</i>        |
| <i>MAX2</i>      | <i>AT2G42620</i>        |
| <i>MAX3</i>      | <i>AT2G44990</i>        |
| <i>U-BOX</i>     | <i>AT5G15400</i>        |
| <i>WOX4</i>      | <i>AT1G46480</i>        |
